# Supplementary material
Source: MDPI journal article supplement (https://www.mdpi.com/2076-3271/11/2/35)
Supplement: s1 [file s1]

Review

## Metaplastic Carcinoma of the Breast: Case Series of a Single Institute and Review of the Literature

Alkistis Papatheodoridi, Eleni Papamattheou, Spyridon Marinopoulos, Ioannis Ntanasis-Stathopoulos, Constantine Dimitrakakis, Aris Giannos, Maria Kaparelou, Michalis Lontos, Meletios-Athanasios Dimopoulos and Flora Zagouri

**Table S1.** Baseline characteristics of Alexandra Hospital patients.

|      | Age | Stage at diagnosis | ER | PR | Her2 | Ki67 | Surgery | Chemotherapy | Radiotherapy | Histological type                                 |
|------|-----|--------------------|----|----|------|------|---------|--------------|--------------|---------------------------------------------------|
| Pt1  | 71  | IIB                | -  | -  | -    | High | YES     | YES          | YES          | squamous                                          |
| Pt2  | 72  | IIA                | -  | -  | -    | Low  | YES     | YES          | YES          | matrix producing                                  |
| Pt3  | 68  | IIA                | -  | -  | -    | High | YES     | YES          | YES          | mixed                                             |
| Pt4  | 81  | IIA                | -  | -  | -    | High | YES     | NO           | NO           | squamous                                          |
| Pt5  | 48  | IIA                | +  | -  | -    | High | YES     | YES          | NO           | spindle cell carcinoma                            |
| Pt6  | 72  | IIA                | -  | -  | -    | High | YES     | YES          | YES          | mixed                                             |
| Pt7  | 58  | IIB                | -  | -  | -    | High | YES     | YES          | YES          | spindle cell carcinoma                            |
| Pt8  | 54  | IIA                | -  | -  | -    | High | YES     | YES          | YES          | mixed                                             |
| Pt9  | 71  | IA                 | -  | +  | -    | High | YES     | YES          | NO           | mixed                                             |
| Pt10 | 41  | IIA                | +  | +  | -    | High | YES     | YES          | YES          | mixed                                             |
| Pt11 | 32  | IIB                | -  | -  | -    | High | YES     | YES          | YES          | squamous                                          |
| Pt12 | 75  | IIB                | -  | -  | -    | High | YES     | YES          | YES          | squamous                                          |
| Pt13 | 59  | IIA                | -  | -  | -    | High | YES     | YES          | YES          | mixed                                             |
| Pt14 | 73  | IIIC               | -  | -  | -    |      | YES     | YES          | NO           | mixed                                             |
| pt15 | 58  | IIA                | -  | -  | -    |      | YES     | YES          | YES          | mixed                                             |
| pt16 | 36  | IIB                | -  | -  | -    |      | YES     | YES          | YES          | mixed                                             |
| pt17 | 49  | IIA                | -  | -  | -    |      | YES     | YES          | NO           | matrix producing                                  |
| pt18 | 42  | IIB                | -  | -  | -    |      | YES     | YES          | YES          | mixed                                             |
| pt19 | 83  | IIA                | -  | -  | -    | High | YES     | NO           | NO           | matrix producing                                  |
| pt20 | 58  | IIB                | -  | -  | -    | High | YES     | YES          | NR           | matrix producing                                  |
| pt21 | 35  | IIB                | -  | -  | -    | High | YES     | NO           | NO           | mixed                                             |
| pt22 | 41  | IIA                | -  | -  | -    | low  | YES     | YES          | YES          | squamous                                          |
| pt23 | 62  | IIA                | -  | -  | -    | High | YES     | YES          | YES          | Metaplastic                                       |
| pt24 | 64  | IIA                | -  | -  | +    | low  | YES     | YES          | YES          | mixed                                             |
| pt25 | 82  | IV                 | -  | +  | -    | low  | YES     | NO           | NO           | Metaplastic                                       |
| pt26 | 55  | IA                 | -  | -  | -    | High | YES     | YES          | YES          | Metaplastic with osseous differention             |
| pt27 | 85  | IIA                | -  | -  | -    |      | YES     | NO           | NO           | mixed                                             |
| pt28 | 59  | IIA                | -  | -  | -    | low  | YES     | YES          | YES          | mixed                                             |
| pt29 | 80  | IA                 | -  | -  | -    |      | YES     | YES          | YES          | Metaplastic                                       |
| pt30 | 45  | IA                 | -  | -  | -    |      | YES     | YES          | YES          | squamous                                          |
| pt31 | 58  | IA                 | -  | -  | -    | high | YES     | YES          | YES          | Metaplastic                                       |
| pt32 | 78  | IIIB               | +  | -  | -    |      | YES     | YES          | YES          | Metaplastic                                       |
| pt33 | 70  | IIIA               | -  | -  | -    | low  | YES     | YES          | NO           | Metaplastic with chondrous & osseous differention |
| pt34 | 65  | IA                 | -  | -  | -    |      | YES     | YES          | YES          | Metaplastic                                       |
| pt35 | 65  | IIB                | -  | -  | -    |      | YES     | YES          | NO           | mixed                                             |
| pt36 | 55  | IIA                | -  | -  | -    |      | YES     | YES          | NO           | squamous                                          |
| pt37 | 66  | IIA                | -  | -  | -    | high | YES     | YES          | YES          | mixed                                             |
| pt38 | 56  | IIA                | -  | -  | -    |      | YES     | YES          | NO           | mixed                                             |
| pt39 | 70  | IIIA               | -  | -  | -    |      | YES     | YES          | YES          | mixed                                             |
| pt40 | 68  | IA                 | -  | -  | -    |      | YES     | YES          | YES          | squamous                                          |
| pt41 | 60  | IIA                | -  | -  | -    | low  | YES     | YES          | YES          | mixed                                             |
| pt42 | 43  | IIA                | -  | -  | -    | low  | YES     | YES          | YES          | squamous                                          |
| pt43 | 77  | IIB                | -  | -  | -    | high | YES     | YES          | YES          | Metaplastic with chondrous differention           |
| pt44 | 65  | IIA                | +  | +  | +    | low  | YES     | YES          | YES          | mixed                                             |
| pt45 | 82  | IA                 | -  | -  | -    | low  | YES     | NO           | NO           | mixed                                             |
| pt46 | 88  | IIA                | -  | -  | -    | low  | YES     | YES          | NO           | squamous                                          |
